# Supplementary material for: Communication to adult patients undergoing cancer care by non-specialist nurses: a scoping review protocol
Source: HighWire-hosted journal article supplement (doi:10.1136/bmjopen-2023-081326), 2024-03-01
Supplement: bmjopen-2023-081326supp001_data_supplement.pdf [file bmjopen-2023-081326supp001_data_supplement.pdf]

Appendix 1 Scoping search results

On 24 October 2022, a scoping search was conducted to check if this scoping review (or any review) is in process or has been conducted in the past. JBI systematic review register, Prospero, Cochrane register, and PubMed was searched using the simple search term "cancer communication". The table below summarises the findings:

| Database                       | Summary                                                                                                                                                                                  |
|--------------------------------|------------------------------------------------------------------------------------------------------------------------------------------------------------------------------------------|
| Prospero                       | The search retrieved nine records.<br><br>No registered review of the proposed topic.                                                                                                    |
| JBI systematic review register | Only three articles were retrieved. No article included cancer communication.                                                                                                            |
| PubMed                         | After filtering by meta-analysis, reviews, and systematic reviews, the search term "cancer communication*" yielded 136 studies. No review was similar to this scoping review objectives. |
| Cochrane                       | The search retrieved 35 records. No review was similar to this scoping review objectives.                                                                                                |

Appendix 2 Initial data extraction

MEDLINE

|                                            |                                                                                                                                                                                                                                                                                                     |           |
|--------------------------------------------|-----------------------------------------------------------------------------------------------------------------------------------------------------------------------------------------------------------------------------------------------------------------------------------------------------|-----------|
| 1                                          | Describing the population of this study                                                                                                                                                                                                                                                             | Results   |
| Participants                               | (MH "Nursing Staff+") OR (MH "Nurses+")<br><br>OR (MH "Nursing+") OR (MH "Nursing Care+") OR (MH "Nurse Practitioners+")<br><br>OR (MH "Nursing Staff, Hospital+") OR<br>"nursing staff" OR nurs* OR "nursing care"<br><br>OR "nurse practitioner*" OR "hospital nurse*" OR "non-speciali#ed nurse" | 633,365   |
| 2                                          | Describing the concepts –Cancers                                                                                                                                                                                                                                                                    |           |
| Cancers                                    | (MH "Neoplasms+") OR neoplasm* OR neoplasia Or tum#r* OR "Malignant neoplasm*" OR Malignan* OR cancer* OR "cancer patient"                                                                                                                                                                          | 4,718,229 |
| 3                                          | Describing the concepts-communication and experiences                                                                                                                                                                                                                                               |           |
| Communication and communication experience | (MH "Communication+") OR (MH "Communication Methods, Total") OR (MH "Disclosure+") OR communication OR "information exchange" OR "communication pattern*" OR "communication strategy*" OR "communication method*" OR                                                                                | 3,060,614 |

|   |                                                                            |       |
|---|----------------------------------------------------------------------------|-------|
|   | "communication technique*" OR<br>disclosure OR interaction* OR experience* |       |
| 4 | Combining all concepts                                                     |       |
|   | 1 AND 2 AND 3                                                              | 9,478 |
| 5 | Limiter 1: Date between 2012 and June<br>2022                              | 4,962 |
| 6 | Limiter 2: adult 19 years and above                                        | 2,393 |
| 7 | Limiter 3: English publication                                             | 2,317 |

CINAHL

|              |                                                                                                                                                                              |         |
|--------------|------------------------------------------------------------------------------------------------------------------------------------------------------------------------------|---------|
| 1            | Describing the population of this study                                                                                                                                      | Results |
| Participants | (MH "Nurses+") OR (MH "Nursing Care+")<br>OR "nursing staff" OR nurse* OR "nursing<br>care" OR "nurse practitioner*" OR<br>"hospital nurse*" OR "non-speciali#ed<br>nurse*." | 741,262 |
| 2            | Describing the concepts –Cancers                                                                                                                                             |         |
| Cancers      | (MH "Neoplasms+") OR (MH "Cancer<br>Patients") OR neoplasm* OR neoplasia Or<br>tum#r* OR "Malignant neoplasm*" OR                                                            | 795,776 |

|                                            |                                                                                                                                                                                                                                                                                              |         |
|--------------------------------------------|----------------------------------------------------------------------------------------------------------------------------------------------------------------------------------------------------------------------------------------------------------------------------------------------|---------|
|                                            | Malignan* OR cancer* OR “cancer patients”                                                                                                                                                                                                                                                    |         |
| 3                                          | Describing the concepts-communication and experiences                                                                                                                                                                                                                                        |         |
| Communication and communication experience | (MH "Communication+") OR (MH "Communication Methods, Total") OR (MH "Disclosure+") OR communication OR “information exchange” OR “communication pattern*” OR “communication strategy*” OR "communication method*" OR “communication technique*” OR disclosure OR interaction* OR experience* | 895,801 |
| 4                                          | Combining all concepts                                                                                                                                                                                                                                                                       |         |
|                                            | 1 AND 2 AND 3                                                                                                                                                                                                                                                                                | 9,442   |
| 5                                          | Limiter 1: Date between 2012 and June 2022                                                                                                                                                                                                                                                   | 5,188   |
| 6                                          | Limiter 2: all adults (18 and above)                                                                                                                                                                                                                                                         | 1,940   |
| 7                                          | Limiter 3: English publication                                                                                                                                                                                                                                                               | 1,864   |

PsycINFO

|              |                                                                                                                                                                                                                                                                                                        |         |
|--------------|--------------------------------------------------------------------------------------------------------------------------------------------------------------------------------------------------------------------------------------------------------------------------------------------------------|---------|
| 1            | Describing the population of this study                                                                                                                                                                                                                                                                | Results |
| Participants | MM "Nursing" OR DE "Nurses" OR DE "Psychiatric Nurses" OR DE "Public Health Service Nurses" OR DE "School Nurses" OR "nursing staff" OR nurs* OR "nursing care" OR "nurse practitioner*" OR "hospital nurse*" OR "non-speciali#ed nurse*"                                                              | 111,885 |
| 2            | Describing the concepts –Cancers                                                                                                                                                                                                                                                                       |         |
| Cancers      | DE "Neoplasms" OR DE "Benign Neoplasms" OR DE "Breast Neoplasms" OR DE "Endocrine Neoplasms" OR DE "Leukemias" OR DE "Melanoma" OR DE "Metastasis" OR DE "Nervous System Neoplasms" OR DE "Terminal Cancer" OR neoplasia OR tum#r* OR "Malignant neoplasm*" OR Malignan* OR cancer* OR cancer patient* | 90,760  |

|                                            |                                                                                                                                                                                                                                                                                                                                                                                                                                                                                                                                                                                   |           |
|--------------------------------------------|-----------------------------------------------------------------------------------------------------------------------------------------------------------------------------------------------------------------------------------------------------------------------------------------------------------------------------------------------------------------------------------------------------------------------------------------------------------------------------------------------------------------------------------------------------------------------------------|-----------|
| 3                                          | Describing the concepts-communication and experiences                                                                                                                                                                                                                                                                                                                                                                                                                                                                                                                             |           |
| Communication and communication experience | DE "Communication" OR DE "Augmentative Communication" OR DE "Communication Barriers" OR DE "Electronic Communication" OR DE "Interpersonal Communication" OR DE "Messages" OR DE "Nonverbal Communication" OR DE "Persuasive Communication" OR DE "Privileged Communication" OR DE "Scientific Communication" OR DE "Social Communication" OR DE "Verbal Communication" OR communication OR "information exchange" OR "communication pattern*" OR "communication strategy*" OR "communication method*" OR "communication technique*" OR disclosure OR interaction* OR experience* | 1,183,559 |
| 4                                          | Combining all concepts                                                                                                                                                                                                                                                                                                                                                                                                                                                                                                                                                            |           |
|                                            | 1 AND 2 AND 3                                                                                                                                                                                                                                                                                                                                                                                                                                                                                                                                                                     | 2,450     |

|   |                                            |       |
|---|--------------------------------------------|-------|
| 5 | Limiter 1: Date between 2012 and June 2022 | 1,413 |
| 6 | Limiter 2: adult 18 years and above        | 1,125 |
| 7 | Limiter 3: English publication             | 1,116 |
